# Supplementary material for: Curcumin inhibits the proliferation and migration of vascular smooth muscle cells by targeting the chemerin / CMKLR1 / LCN2 axis
Source: Aging (Albany NY). 2021 May 24;13(10):13859–75. doi: 10.18632/aging.202980 (PMC8202847; doi:10.18632/aging.202980)
Supplement: Supplementary Figures [file aging-13-202980-s001.pdf]

## SUPPLEMENTARY FIGURES

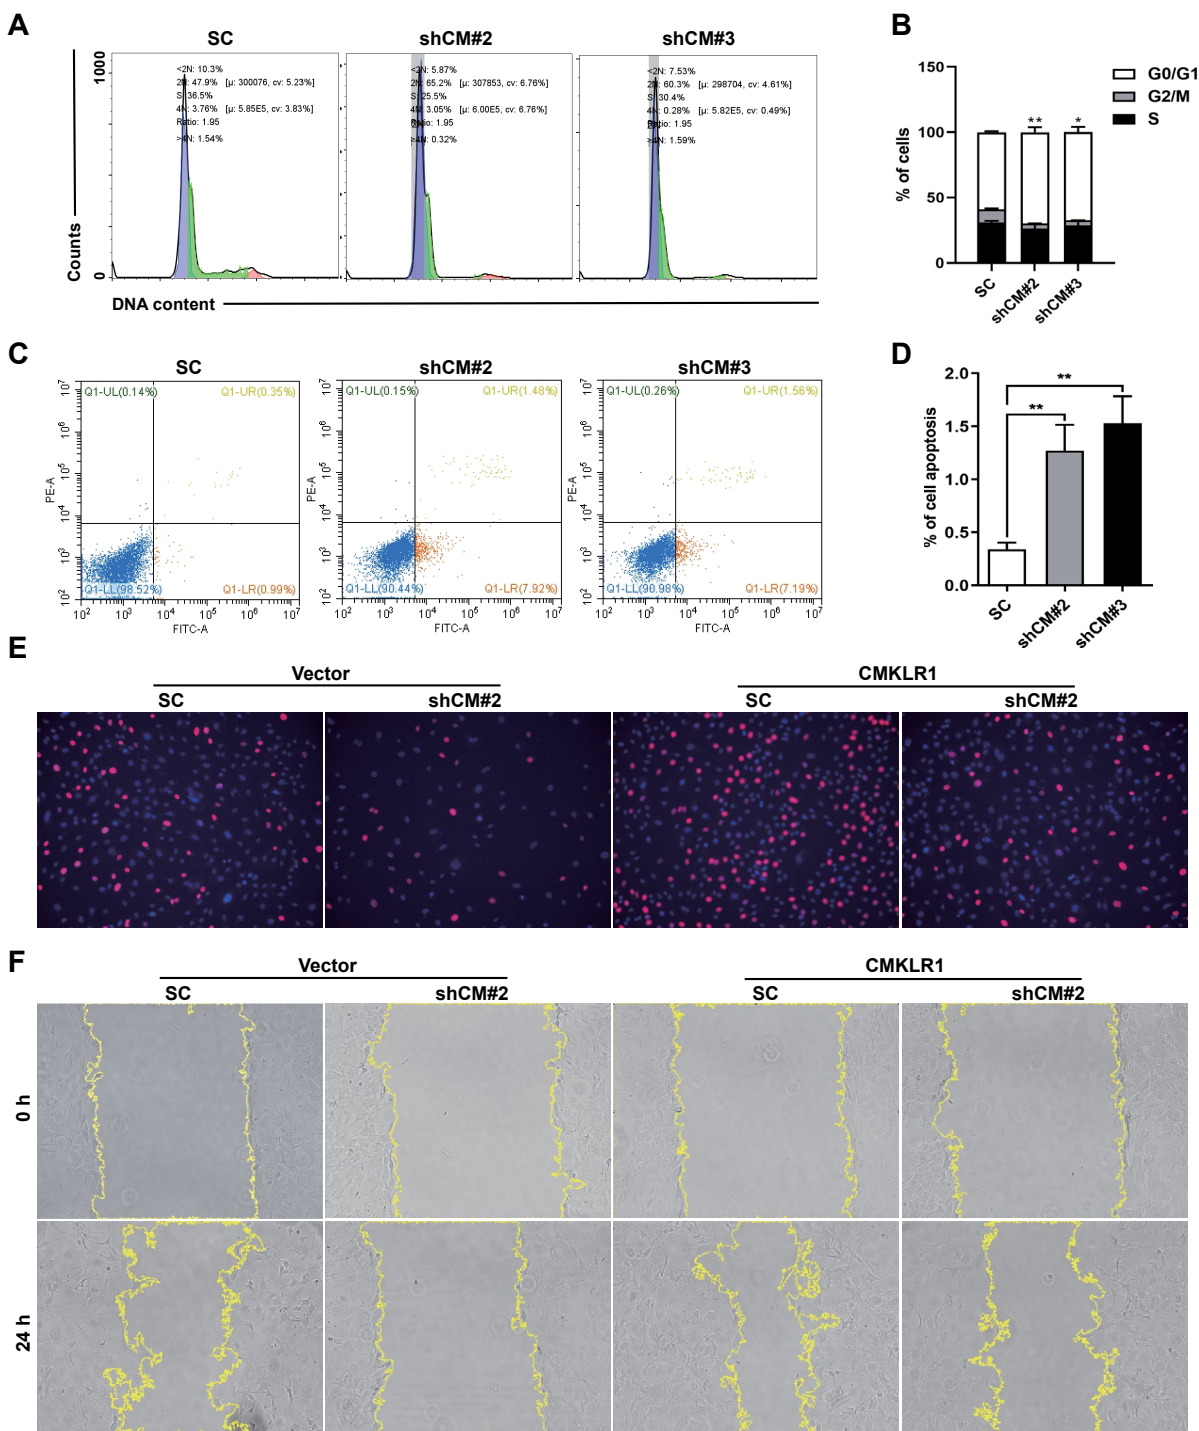

**Supplementary Figure 1. Downregulation of CMKLR1 inhibit VSMCs proliferation and migration.** (A) CMKLR1 depletion induced VSMCs cell cycle arrest, as assessed by flow cytometry analysis. \*\*,  $p < 0.01$ ; \*,  $p < 0.05$ . (B) Percentage of apoptotic cells as determined by flow cytometry and analyzed using Flowjo software. \*\*,  $p < 0.01$ . (C) Analysis of the EdU-incorporated cells following the application of plasmids encoding CMKLR1 to overexpress CMKLR1 expression in VSMCs with or without CMKLR1 knockdown. (D) Cell migration as determined by wound healing assay. (E) Analysis of the EdU-incorporated cells following the application of plasmids to overexpress CMKLR1 expression in VSMCs with or without CMKLR1 knockdown. (F) Cell migration as determined by wound healing assay.

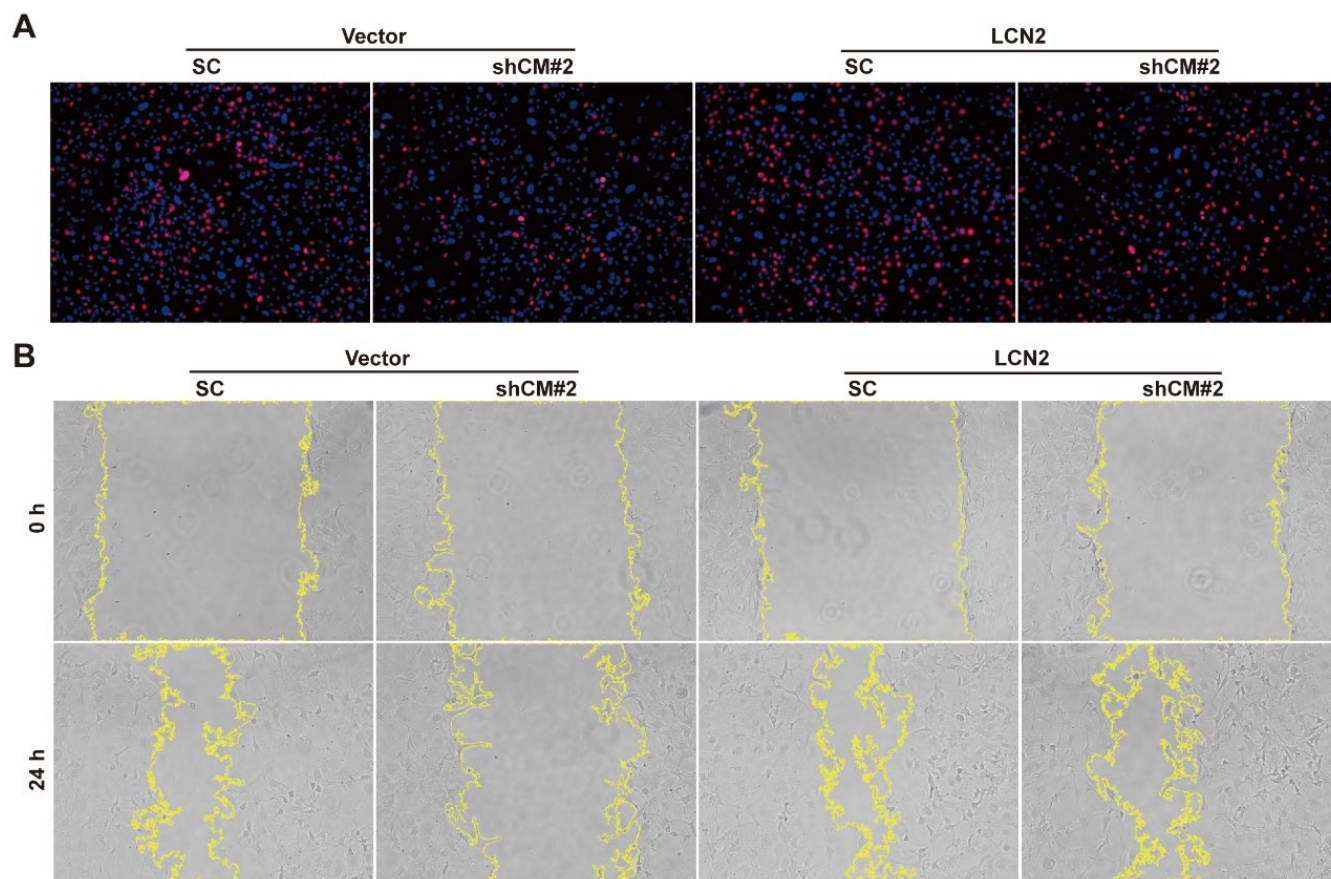

**Supplementary Figure 2. LCN2 is essential for the inhibition of VSMCs proliferation by CMKLR1 depletion.** (A) Analysis of the EdU-incorporated cells following the application of plasmids encoding LCN2 to overexpress LCN2 expression in VSMCs with or without CMKLR1 knockdown. (B) Cell migration as determined by wound healing assay.
